# Supplementary material for: Effect of π-spacers and anchoring groups on the photovoltaic performances of ullazine-based dyes
Source: Royal Society of Chemistry journal article supplement (doi:10.1039/c6ra11918b), 2016-01-01
Supplement: c6ra11918b1.pdf [file c6ra11918b1.pdf]

## Electronic Supporting Information

### Effect of $\pi$ -spacers and anchoring groups on the photovoltaic performances of ullazine-based dyes

He Qiao, Yanghua Deng, Ruipeng Peng, Guo Wang, Jing Yuan, Songting Tan

#### $^1\text{H}$ NMR and $^{13}\text{C}$ NMR spectra

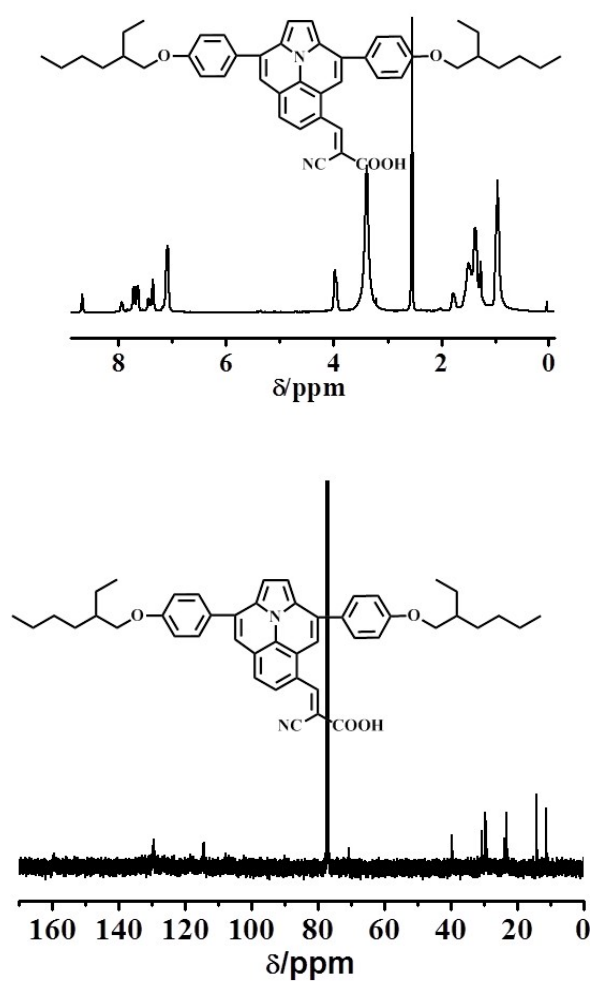

Figure S1  $^1\text{H}$  NMR and  $^{13}\text{C}$  NMR spectra of QD1

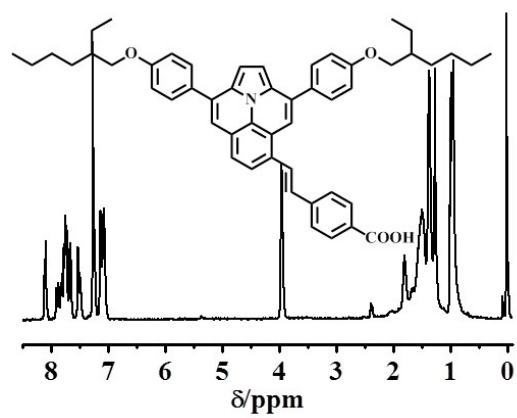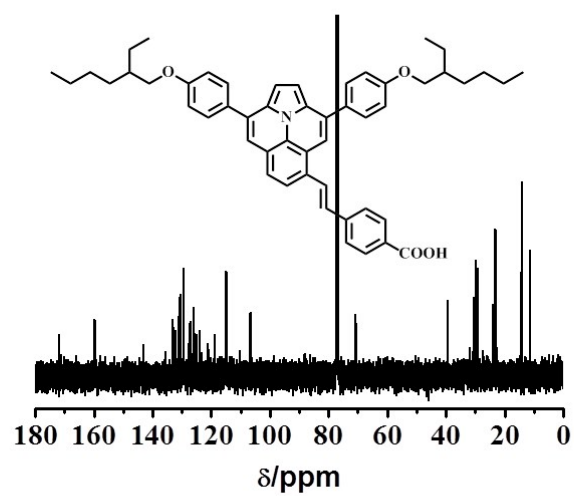

Figure S2 <sup>1</sup>H NMR and <sup>13</sup>C NMR spectra of QD2

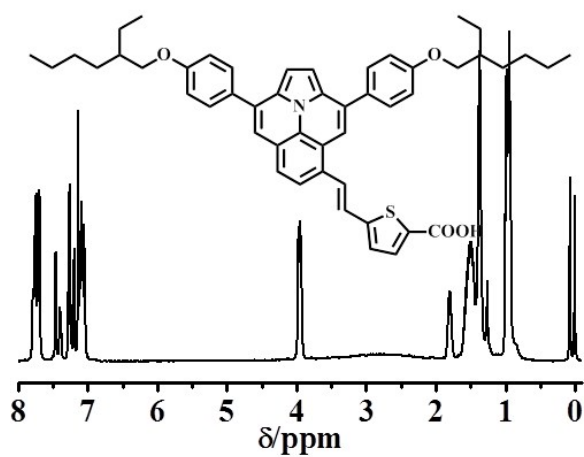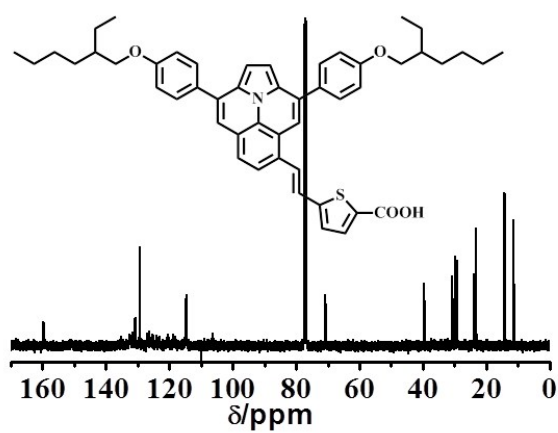

**Figure S3** <sup>1</sup>H NMR and <sup>13</sup>C NMR spectra of QD3
